# Supplementary material
Source: Research Square preprint supplement (doi:10.21203/rs.3.rs-9119904/v1)
Supplement: Supplementary file 1 [file 50998b52ef35b0dd743905bc.pdf]

# Trehalose Transport as a Male-Specific Axis of Mosquito Energy Metabolism and Reproductive Fitness

Nirmala Sankhala<sup>1,2#</sup>, Tanvi Singh<sup>1,2#</sup>, Pooja Yadav<sup>1,2</sup>, Vaishali Saini<sup>1,2</sup>, Pooja Rohilla<sup>1,2</sup>,  
Vartika Srivastava<sup>1,2</sup>, Gunjan Sharma<sup>1,2</sup>, Suchi Tyagi<sup>1,2</sup>, Sanjay Tevatiya<sup>1</sup>,  
Punita Sharma<sup>1\*</sup>, Rajnikant Dixit<sup>1,2\*</sup>

<sup>1</sup>-Laboratory of Host-Parasite Interaction Studies, Department of Vector Genomics, ICMR-National Institute of Malaria Research, Dwarka, New Delhi, 110077, India.

<sup>2</sup>- Academy of Scientific and Innovative Research (AcSIR), Ghaziabad, Uttar Pradesh-201002.

# Equally contributed

## Supplementary material

### 1- In silico characterization

#### Conserved domains on

[Icl|SEQMD5\_29a4acc402497807fbb33a8d45bod365]

[Find similar domain architectures](#)

Live BLAST, RID = UG03J4FE014

Database: CDSEARCH/cdd

E-value cut off: 0.01

Composition-based adjustment: yes

Low-complexity filter: no

[Refine parameters and search again](#)

**Protein classification:** *sugar porter family MFS transporter* (ArchID 13024188)

sugar porter family major facilitator superfamily (MFS) transporter facilitates the transport across cytoplasmic or internal membranes of one or more from a variety of sugar or polyol substrates such as glucose, galactose, trehalose, and arabinose, among others

**Attributes:**

PubMed: 28588501|17606922|26758938|26098515|26234418

Gene Ontology: GO:0016020|GO:0055085|GO:0022857|GO:0008643

CATH: 1.20.1250.20

SCOP: 3000310

TCDB: 2.A.1.1

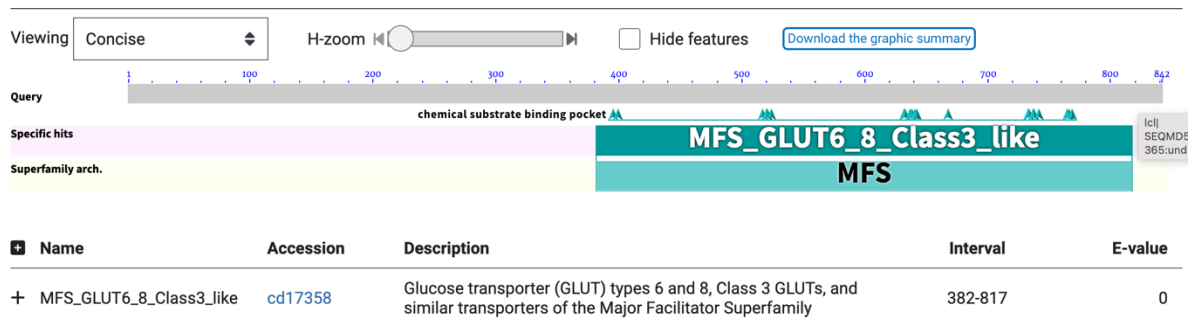

**Supplementary Figure S1. Conserved domain analysis of the *Anopheles stephensi* trehalose transporter TRET1 (ASTE010234; 842 aa) using the NCBI Conserved Domain Database (CDD)**

CD-Search tool (E-value cutoff: 0.01; composition-based adjustment: yes). The query sequence was classified as a sugar porter family MFS transporter (ArchID 13024188). A specific hit to the MFS\_Glut6\_8\_Class3\_like domain (accession cd17358) was identified spanning residues 382–817 with an E-value of 0, corresponding to Class 3 glucose transporter (GLUT) types 6 and 8 and related transporters of the Major Facilitator Superfamily. The broader MFS superfamily architecture encompasses the same region. Predicted chemical substrate binding pocket residues are indicated along the query sequence.

## 2- Sugar survival assay

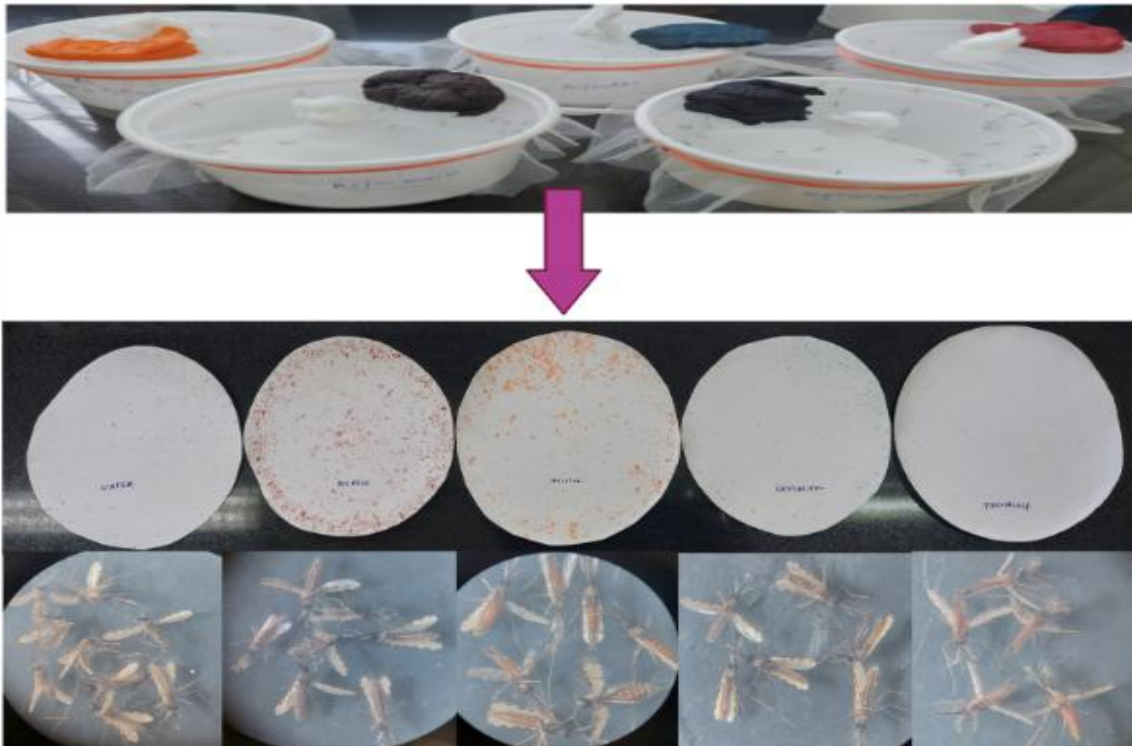

**Supplementary Figure S2.** Dye tracing confirmation of sugar feed uptake in adult *Anopheles stephensi* mosquitoes. (a) Experimental setup showing dye-supplemented sugar solution delivered via soaked cotton pads placed on cups housing adult mosquitoes within rearing cages. (b) Paper cutouts positioned beneath the cages displaying coloured spots from dye-containing excreta deposited following diuresis, confirming active ingestion and processing of the feed solution within 24 hours. (c) Adult male and female mosquitoes exhibiting visible dye accumulation through the translucent abdominal cuticle, providing direct evidence of feed uptake.

| Treatment  |    | Sex of adult mosquito | Mean longevity (days) | Mantel cox test chi square value (Control 10% sucrose Vs test) | p-value (Control Vs test) |
|------------|----|-----------------------|-----------------------|----------------------------------------------------------------|---------------------------|
| Erythritol | 2% | male                  | 3                     | 284.1                                                          | <0.0001                   |

|                         |               |        |                         |        |         |
|-------------------------|---------------|--------|-------------------------|--------|---------|
|                         | 5%            | female | 3                       | 292.4  | <0.0001 |
|                         |               | male   | 3                       | 293.8  | <0.0001 |
|                         | 10%           | female | 3                       | 298.2  | <0.0001 |
|                         |               | male   | 3                       | 290.2  | <0.0001 |
| <b>Xylitol</b>          | 2%            | male   | 6                       | 259.7  | <0.0001 |
|                         |               | female | 7                       | 286.8  | <0.0001 |
|                         | 5%            | male   | 9                       | 179    | <0.0001 |
|                         |               | female | 11                      | 61.03  | <0.0001 |
|                         | 10%           | male   | 11                      | 109.1  | <0.0001 |
|                         |               | female | 14                      | 9.818  | <0.0017 |
| <b>Trehalose</b>        | 2%            | male   | 11                      | 126.7  | <0.0001 |
|                         |               | female | 13                      | 0.4708 | 0.4926  |
|                         | 5%            | male   | 11                      | 136.4  | <0.0001 |
|                         |               | female | 13                      | 0.008  | 0.9284  |
|                         | 10%           | male   | 9                       | 185.9  | <0.0001 |
|                         |               | female | 11                      | 11.54  | 0.0007  |
| <b>Positive control</b> | 10% (Sucrose) | male   | 22,19,20=<br>20.33      |        |         |
|                         |               | female | 14,17,10=<br>13.66      |        |         |
| <b>Negative control</b> | Water         | male   | 3,3,4: Av.<br>3.33 days |        |         |
|                         |               | female | 3,5,5: Av.<br>4.33 days |        |         |

**Supplementary Table S1. Mean longevity (days) and Mantel-Cox (log-rank) survival analysis of adult *Anopheles stephensi* ; mosquitoes fed on erythritol, xylitol, or trehalose at 2%, 5%, and 10% concentrations. Each treatment group comprised 50 mosquitoes across three biological replicates per sex. Survival of each treatment group was compared against the positive control (10% sucrose) using the Mantel-Cox chi-square test. Water-only fed mosquitoes served as the negative control. P-values less than 0.05 were considered statistically significant.**

### 3- Mating status assay

| Sex of adult mosquito | Treatment     | Mating status | Mean longevity (days) | Mantel cox test chi square value (Control 10% sucrose Vs test) | p-value (Control Vs test) | Significance |
|-----------------------|---------------|---------------|-----------------------|----------------------------------------------------------------|---------------------------|--------------|
| female                | Sucrose 10%   | virgin        | 16                    | 16.42 (Vir vs mated SF female)                                 | <0.0001                   | ****         |
|                       |               | mated         | 10                    |                                                                |                           |              |
|                       | Blood feeding | Virgin        | 9                     | 4.6 (Vir vs mated BF female)                                   | 0.0320                    | ns           |
|                       |               | mated         | 10                    |                                                                |                           |              |
| male                  |               | virgin        | 15                    |                                                                | 0.0002                    | ***          |

|  |             |                        |      |                                |         |      |
|--|-------------|------------------------|------|--------------------------------|---------|------|
|  | Sucrose 10% | Mated(with SF female)  | 12.5 | 14.17 (Vir vs mated SF female) |         |      |
|  |             | Mated (with BF female) | 12   | 24 (Vir vs mated BF female)    | <0.0001 | **** |

**Supplementary Table S2.** Mean longevity (days) and Mantel-Cox (log-rank) survival analysis of virgin and mated adult *Anopheles stephensi* mosquitoes maintained on 10% sucrose. Survival of each treatment group was compared against the respective control using the Mantel-Cox chi-square test in GraphPad Prism. P-values less than 0.05 were considered statistically significant.

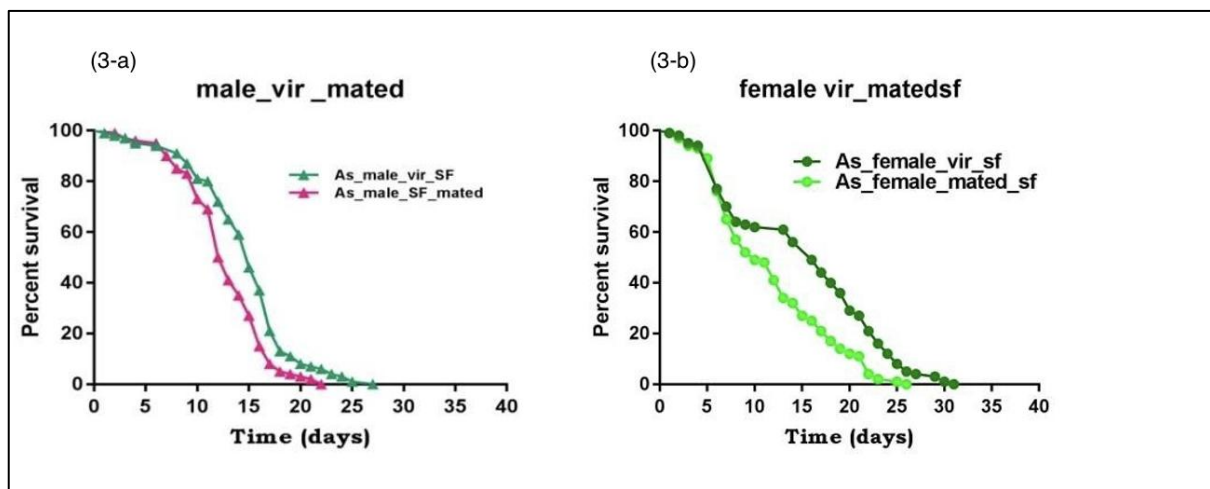

**Supplementary Figure S3- Kaplan-Meier survival curves of virgin and mated adult *Anopheles stephensi* mosquitoes maintained on 10% sucrose-** (a) Male survival comparing virgin sugar-fed (As\_male\_vir\_SF) and mated sugar-fed (As\_male\_SF\_mated) groups. (b) Female survival comparing virgin sugar-fed (As\_female\_vir\_sf) and mated sugar-fed (As\_female\_mated\_sf) groups.

#### 4- Mating sequence sample collection

| Stage        | Description of Condition                                       | Time of Collection | Notes               |
|--------------|----------------------------------------------------------------|--------------------|---------------------|
| Control      | Before male–female mixing                                      | 12:00 PM           | Baseline reference  |
| Pre-swarm    | After mixing (3–4-day adults at 3 PM) but before visible swarm | 6:00 PM            | Same day as mixing  |
| Active swarm | During visible swarming activity                               | 7:00–8:00 PM       | Peak swarm behavior |

| Stage      | Description of Condition                           | Time of Collection | Notes                                   |
|------------|----------------------------------------------------|--------------------|-----------------------------------------|
| Coupled    | During swarm; males and females observed in copula | 7:00–8:00 PM       | Collected in parallel with active swarm |
| Post-swarm | Next day, after swarm activity is complete         | 7:00 AM            | Reflects recovery phase                 |

**Supplementary Table S3.** Description of mating stage conditions and corresponding sample collection time points used for tissue-specific gene expression profiling of adult *Anopheles stephensi* males. Mosquitoes were sampled across five stages of the swarming and mating sequence: control (pre-mixing baseline), pre-swarm, active swarm, coupled (in copula), and post-swarm (following day recovery).

## 5 – Quantitative PCR

Supplementary table – 4 – Primer sequences

| Gene                  | Sequence                                                                                        |
|-----------------------|-------------------------------------------------------------------------------------------------|
| Trehalase             | Fw: 5' ACGTTTAACAAAACGAGAGC 3'<br>Rev: 5' GCCGGTATTGATGGAGTAT 3'                                |
| Trehalose Transporter | Fw GGTGTACTGTATCGGGTTTG<br>Rev TAAGTCCCTTGGTTTCCATA                                             |
| S7                    | Fw<br>5'- ATG GTG TTC GGT TCC AAG GTG -3'<br><br>Rev<br>5'- CTT CTT GTT GTT GAA CTC GAC CTC -3' |
| Actin                 | Fw: 5' TGCGTGACATCAAGGAGAAG 3'<br>Rev: 5'GATTCCATACCCAGGAACGA 3'                                |

**Supplementary Table S4.** Forward (Fw) and reverse (Rev) primer sequences used for RT-qPCR analysis of trehalase (TreH), trehalose transporter (TreT), and the reference genes ribosomal protein S7 and Actin in *Anopheles stephensi*.

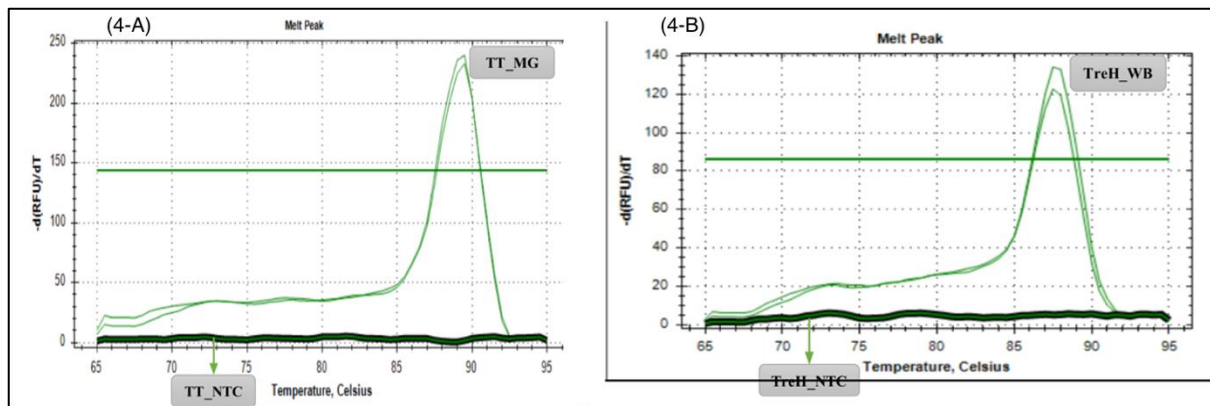

**Supplementary Figure S4.** Melt curve analysis confirming primer specificity for RT-qPCR assays. (A) Melt peak profile of the trehalose transporter (TT) primer pair amplified from midgut (MG) cDNA, showing a single sharp peak indicative of a specific amplification product, with no amplification detected in the no-template control (TT\_NTC). (B) Melt peak profile of the trehalase (TreH) primer pair amplified from whole-body (WB) cDNA, displaying a single specific peak with no amplification in the corresponding no-template control (TreH\_NTC). The presence of single melt peaks and flat NTC traces confirm the absence of primer-dimers and non-specific amplification.

## 5- RNAi – silencing

|        |                                                                                                                         |
|--------|-------------------------------------------------------------------------------------------------------------------------|
| TT_DSR | Fw: <b>TAATACGACTCACTATAGGG</b> GATGAGGATGAGAACAGCTT<br>Rev: <b>TAATACGACTCACTATAGGG</b> CATCGAGACTCTTGTGTTTG           |
| TH_DSR | Fw: 5' <b>TAATACGACTCACTATAGGG</b> GGATTCGTA CTGGATCGTAA 3'<br>Rev: 5' <b>TAATACGACTCACTATAGGG</b> CATCGAGACTCTTGTGTTTG |
| GFP    | dsGFP_F: TAATACGACTCACTATAGACGACGGCAACTACAAGACC<br>dsGFP_R: TAATACGACTCACTATAGGAACTCCAGCAGGACCATGT                      |

**Supplementary Table S5.** Forward (Fw) and reverse (Rev) primer sequences carrying T7 promoter overhangs (underlined: TAATACGACTCACTATAGG) used for the synthesis of double-stranded RNA (dsRNA) targeting the trehalose transporter (TT\_DSR), trehalase (TH\_DSR), and green fluorescent protein (dsGFP; non-target injection control) in *Anopheles stephensi* RNAi knockdown experiments.

## 6- Additional information about data and analysis

| Item | File Name/Type                           | Description                                                                                                                                                                                                   |
|------|------------------------------------------|---------------------------------------------------------------------------------------------------------------------------------------------------------------------------------------------------------------|
| 1    | RMarkdown reports (.Rmd exported as PDF) | Reproducible analysis scripts with embedded data for all experiments except the trehalose assay, including RT-qPCR expression profiling, survival analysis, fecundity analysis, and RNAi knockdown validation |

| Item | File Name/Type            | Description                                                                                                                            |
|------|---------------------------|----------------------------------------------------------------------------------------------------------------------------------------|
| 2    | t_data.csv and s_data.csv | t_data.csv -Raw trehalose assay data used for hemolymph trehalose and glucose concentration calculations, s_data.csv for standard data |
| 3    | Copulation video (.mp4)   | Video documentation depicting mating behaviour and in copula sample collection procedure during swarming                               |
| 4    | FASTA file (.fasta)       | protein sequences of trehalose transporter orthologs used for phylogenetic analysis                                                    |
| 5    | Newick tree file (.nwk)   | Maximum-likelihood phylogenetic tree output used to generate Figure 1c                                                                 |

**Supplementary Table S6.** Description of data and materials deposited in Figshare - 10.6084/m9.figshare.31648699

Private link - <https://figshare.com/s/53c8781ae50abcaab28>
